# 1 **CoronaHiT: High throughput sequencing of SARS-CoV-2** 2 **genomes**

3 Dave J. Baker<sup>1,\*</sup>, Alp Aydin<sup>1,\*</sup>, Thanh Le-Viet<sup>1</sup>, Gemma L. Kay<sup>1</sup>, Steven Rudder<sup>1</sup>,  
4 Leonardo de Oliveira Martins<sup>1</sup>, Ana P. Tedim<sup>1,2</sup>, Anastasia Kolyva<sup>1,3</sup>, Maria Diaz<sup>1</sup>,  
5 Nabil-Fareed Alikhan<sup>1</sup>, Lizzie Meadows<sup>1</sup>, Andrew Bell<sup>1</sup>, Ana Victoria Gutierrez<sup>1</sup>,  
6 Alexander J. Trotter<sup>1,4</sup>, Nicholas M. Thomson<sup>1</sup>, Rachel Gilroy<sup>1</sup>, Luke Griffith<sup>4</sup>, Evelien  
7 M. Adriaenssens<sup>1</sup>, Rachael Stanley<sup>3</sup>, Ian G. Charles<sup>1,4</sup>, Ngozi Elumogo<sup>1,3</sup>, John Wain<sup>1,4</sup>,  
8 Reenesh Prakash<sup>3</sup>, Emma Meader<sup>3</sup>, Alison E. Mather<sup>1,4</sup>, Mark A. Webber<sup>1,4</sup>, Samir  
9 Dervisevic<sup>3</sup>, Andrew J. Page<sup>1,\*,+</sup> and Justin O'Grady<sup>1,4,\*,+</sup>

10

11 1 Quadram Institute Bioscience, Norwich Research Park, Norwich, NR4 7UQ, UK.

12 2 Grupo de Investigación Biomédica en Sepsis - BioSepsis. Hospital Universitario Rio

13 Horteiga/Instituto de Investigación Biomédica de Salamanca (IBSAL),

14 Valladolid/Salamanca, Spain.

15 3 Norfolk and Norwich University Hospital, Colney Lane, Norwich, NR4 7UY, UK.

16 4 University of East Anglia, Norwich Research Park, Norwich, NR4 7TJ, UK.

17 \*Contributed equally

18 <sup>+</sup>Corresponding authors: [andrew.page@quadram.ac.uk](mailto:andrew.page@quadram.ac.uk) (bioinformatics);

19 [justin.ogradey@quadram.ac.uk](mailto:justin.ogradey@quadram.ac.uk) (sequencing)

20 Keywords: SARS-CoV-2, Nanopore, Sequencing, NGS, Genome, Genetic, multiplexing,

21 ARTIC

## 22 **Abstract**

23 The COVID-19 pandemic has spread to almost every country in the world since it started  
24 in China in late 2019. Controlling the pandemic requires a multifaceted approach  
25 including whole genome sequencing to support public health interventions at local and  
26 national levels. One of the most widely used methods for sequencing is the ARTIC  
27 protocol, a tiling PCR approach followed by Oxford Nanopore sequencing (ONT) of up  
28 to 96 samples at a time. There is a need, however, for a flexible, platform agnostic,  
29 method that can provide multiple throughput options depending on changing  
30 requirements as the pandemic peaks and troughs. Here we present CoronaHiT, a method  
31 capable of multiplexing up to 96 small genomes on a single MinION flowcell or >384  
32 genomes on Illumina NextSeq, using transposase mediated addition of adapters and PCR  
33 based addition of barcodes to ARTIC PCR products. We demonstrate the method by  
34 sequencing 95 and 59 SARS-CoV-2 genomes for routine and rapid outbreak response  
35 runs, respectively, on Nanopore and Illumina platforms and compare to the standard  
36 ARTIC LoCost nanopore method. Of the 154 samples sequenced using the three  
37 approaches, genomes with  $\geq 90\%$  coverage (GISAID criteria) were generated for 64.3%  
38 of samples for ARTIC LoCost, 71.4% for CoronaHiT-ONT, and 76.6% for CoronaHiT-  
39 Illumina and have almost identical clustering on a maximum likelihood tree. In  
40 conclusion, we demonstrate that CoronaHiT can multiplex up to 96 SARS-CoV-2  
41 genomes per MinION flowcell and that Illumina sequencing can be performed on the  
42 same libraries, which will allow significantly higher throughput. CoronaHiT provides  
43 increased coverage for higher Ct samples, thereby increasing the number of high quality

44 genomes that pass the GISAID QC threshold. This protocol will aid the rapid expansion  
45 of SARS-CoV-2 genome sequencing globally, to help control the pandemic.

## 46 **Introduction**

47 The COVID-19 pandemic caused by the SARS-CoV-2 virus began late 2019 in Wuhan,  
48 China and has now spread to virtually every country in the world, with tens of millions of  
49 confirmed cases and millions of deaths (Dong, Du, and Gardner 2020). Key to the control  
50 of the pandemic is understanding the epidemiological spread of the virus at global,  
51 national and local scales (Shu and McCauley 2017). Whole genome sequencing of  
52 SARS-CoV-2 is likely to be the fastest and most accurate method to study virus  
53 epidemiology as it spreads. We are sequencing SARS-CoV-2 as part of the COVID-19  
54 Genomics UK (COG-UK) consortium, a network of academic and public health  
55 institutions across the UK brought together to collect, sequence and analyse whole  
56 genomes to fully understand the transmission and evolution of this virus  
57 (<https://www.cogconsortium.uk/>). The SARS-CoV-2 genome was first sequenced in  
58 China using a metatranscriptomic approach (Wu et al. 2020). This facilitated the design  
59 of tiling PCR approaches for genome sequencing, the most widely used of which is the  
60 ARTIC Network (<https://artic.network>) protocol. Consensus genome sequences are  
61 typically made publicly available on GISAID (Elbe and Buckland & Merrett 2017). This  
62 has enabled real-time public health surveillance of the spread and evolution of the  
63 pandemic through interactive tools such as NextStrain (Hadfield et al. 2018). The ARTIC  
64 network protocol was designed for nanopore technology (Oxford Nanopore  
65 Technologies), enabling rapid genome sequencing for outbreak response. The method

66 was originally capable of testing only 23 samples plus a negative control on a flowcell,  
67 however, with the recent release of the Native Barcoding Expansion 96 kit by ONT, 11-  
68 95 samples plus a negative control can be sequenced on a flowcell using the ARTIC  
69 LoCost V3 method (Quick, 2020). A platform agnostic method is required to provide  
70 flexible throughput on Illumina or nanopore that allows low-cost sequencing of 10s to  
71 100s of viral genomes depending on (1) changing requirements as the pandemic peaks  
72 and troughs and (2) the turnaround time required e.g. routine weekly vs rapid outbreak  
73 sequencing. Here we describe a flexible protocol, Coronavirus High Throughput  
74 (CoronaHiT), which allows for up to 95 samples, plus a negative control to be  
75 multiplexed on a single MinION flowcell or alternatively, by switching barcodes, over  
76 384 samples on Illumina. We demonstrate CoronaHiT's performance on 95 and 59  
77 SARS-CoV-2 genomes on MinION and Illumina NextSeq for routine and rapid outbreak  
78 response runs, respectively, and compare to the ARTIC LoCost protocol.

79  
80  
81  
82  
83  
84  
85

## 86 **Methods**

### 87 ***Patient samples and RNA extraction***

88 Samples from cases with suspected SARS-CoV-2 were processed using five different  
89 diagnostic platforms over four laboratories in East Anglia - the Cytology Department and  
90 Microbiology Departments, NNUH, Norwich, UK, the Bob Champion Research &  
91 Education Building (BCRE), University of East Anglia, Norwich, UK and Ipswich Public  
92 Health Laboratory, Ipswich, UK.

93 The Cytology Department processed samples using the Roche Cobas® 8800 SARS-CoV-  
94 2 system ([www.who.int/diagnostics\\_laboratory/eul\\_0504-046-  
95 00\\_cobas\\_sars\\_cov2\\_qualitative\\_assay\\_ifu.pdf?ua=1](http://www.who.int/diagnostics_laboratory/eul_0504-046-00_cobas_sars_cov2_qualitative_assay_ifu.pdf?ua=1)) according to the manufacturer's  
96 instructions (n=95). The Microbiology Department processed samples using either the  
97 Hologic Panther System Aptima® SARS-CoV-2 assay  
98 ([www.fda.gov/media/138096/download](http://www.fda.gov/media/138096/download)) (n=25) or Altona Diagnostics RealStar® SARS-  
99 CoV-s RT-PCR Kit 1.0 ([altona-diagnostics.com/files/public/Content%20Homepage/-  
100 %2002%20RealStar/MAN%20-%20CE%20-%20EN/RealStar%20SARS-CoV-2%20RT-  
101 PCR%20Kit%201.0\\_WEB\\_CE\\_EN-S03.pdf](http://altona-diagnostics.com/files/public/Content%20Homepage/-%2002%20RealStar/MAN%20-%20CE%20-%20EN/RealStar%20SARS-CoV-2%20RT-PCR%20Kit%201.0_WEB_CE_EN-S03.pdf)) according to the manufacturer's  
102 instructions (n=3). At the BCRE, RNA was extracted using the MagMAX™  
103 Viral/Pathogen II Nucleic Acid Isolation kit (Applied Biosystems) according to the  
104 manufacturer's instructions and the KingFisher Flex system (ThermoFisher). The  
105 presence of SARS-CoV-2 was determined using the 2019-nCoV CDC assay  
106 (<https://www.fda.gov/media/134922/download>) on the QuantStudio 5 (Applied

107 Biosystems) (n=7). Ipswich Public Health Laboratory processed samples using the  
108 AusDiagnostics SARS-CoV-2, Influenza and RSV 8-well panel  
109 ([www.ausdx.com/qilan/Products/20081-](http://www.ausdx.com/qilan/Products/20081-r01.1.pdf)  
110 [r01.1.pdf](http://www.ausdx.com/qilan/Products/20081-r01.1.pdf);jsessionid=5B2099CAE4D0D152C869A190D0032D71) (n=24). RNA was  
111 extracted from swab samples using either the AusDiagnostics MT-Prep (AusDiagnostics)  
112 or QIASymphony (Qiagen) platforms according to the manufacturer's instructions before  
113 being tested by the AusDiagnostics assay.

114  
115 Viral transport medium from positive swabs (stored at 4°C) was collected for all samples  
116 run on the Roche Cobas®, Hologic Panther System and Altona RealStar®. In all other  
117 cases excess RNA was collected (frozen at -80°C). Excess positive SARS-CoV-2  
118 inactivated swab samples (200µl viral transport medium from nose and throat swabs  
119 inactivated in 200 µl Zymo DNA/RNA shield and 800 µl Zymo viral DNA/RNA buffer)  
120 were collected from Cytology and the Microbiology Departments. SARS-CoV-2 positive  
121 RNA extracts (~20 µl) were collected from Ipswich Public Health Laboratory and the  
122 BCRE as part of the COG-UK Consortium project (PHE Research Ethics and  
123 Governance Group R&D ref no NR0195). RNA was extracted from inactivated swab  
124 samples using the Quick DNA/RNA Viral Magbead kit from step 2 of the DNA/RNA  
125 purification protocol (Zymo) ([files.zymoresearch.com/protocols/\\_r2140\\_r2141\\_quick-](http://files.zymoresearch.com/protocols/_r2140_r2141_quick-dna-rna_viral_magbead.pdf)  
126 [dna-rna\\_viral\\_magbead.pdf](http://files.zymoresearch.com/protocols/_r2140_r2141_quick-dna-rna_viral_magbead.pdf)).

127

128 The lower of the cycle thresholds (Ct) produced by the two SARS-CoV-2 assays in the  
129 Roche, AusDiagnostics, Altona Diagnostics and CDC assays were used to determine  
130 whether samples required dilution before sequencing according to the ARTIC protocol.  
131 The Aptima SARS-CoV-2 assay on the Hologic Panther System does not provide a Ct  
132 value but rather a combined fluorescence signal for both targets in relative light units  
133 (RLUs), therefore all samples tested by the Hologic Panther were processed undiluted in  
134 the ARTIC protocol.

135

### 136 ***ARTIC SARS-CoV-2 multiplex tiling PCR***

137 cDNA and multiplex PCR reactions were prepared following the ARTIC nCoV-2019  
138 sequencing protocol V3 (LoCost) (Quick, 2020). Dilutions of RNA were prepared when  
139 required based on Ct values following the guidelines from the ARTIC protocol.

140 V3 CoV-2 primer scheme ([https://github.com/artic-network/artic-  
141 ncov2019/tree/master/primer\\_schemes/nCoV-2019/V3](https://github.com/artic-network/artic-ncov2019/tree/master/primer_schemes/nCoV-2019/V3)) were used to perform the  
142 multiplex PCR for SARS-CoV-2 according to the ARTIC protocol (Quick, 2020). For the  
143 ARTIC multiplex PCR, 65°C was chosen as the annealing/extension temperature, and  
144 due to variable Ct values, all samples were run for 35 cycles in the two multiplex PCRs.

145

### 146 ***CoronaHiT-ONT library preparation***

147 Libraries were prepared using a novel modified Illumina DNA prep tagmentation  
148 approach (formerly called Nextera DNA Flex Illumina Library Prep) (Rowan et al. 2019;  
149 Beier et al. 2017). Primers with a 3' end compatible with the Nextera transposon insert  
150 and a 24bp barcode at the 5' end with a 7 bp spacer were used to PCR barcode the  
151 tagmented ARTIC PCR products. The barcode sequences are from the PCR Barcoding  
152 Expansion 1-96 kit (EXP-PBC096, Oxford Nanopore Technologies). Symmetrical dual  
153 barcoding was used, i.e. the same barcode added at each end of the PCR product and up  
154 to 96 samples could be run together using this approach or 95 if a negative control is  
155 included (Supplementary Table 4).

156 ARTIC PCR products were diluted 1:5 (2.5  $\mu$ l Pool 1, 2.5  $\mu$ l Pool 2 and 20  $\mu$ l PCR grade  
157 water). Tagmentation was performed as follows; 0.5  $\mu$ l TB1 Tagmentation Buffer 1 , 0.5  
158  $\mu$ l BLT Bead-Linked Transposase (both contained in Illumina® DNA Prep, (M)  
159 Tagmentation Catalogue No 20018704) and 4  $\mu$ l PCR grade water was made as a master  
160 mix scaled to sample number. On ice, 5  $\mu$ l of tagmentation mix was added to each well of  
161 a chilled 96-well plate. Next, 2  $\mu$ l of diluted PCR product was pipette mixed with the 5  $\mu$ l  
162 tagmentation mix. This plate was sealed and briefly centrifuged before incubation at  
163 55°C for 15 minutes in a thermal cycler (heated lid 65°C) and held at 10°C.

164 PCR barcoding was performed using Kapa 2G Robust PCR kit (Sigma Catalogue No.  
165 KK5005) as follows: 4  $\mu$ l Reaction buffer (GC), 0.4  $\mu$ l dNTP's, 0.08  $\mu$ l Kapa 2G Robust  
166 Polymerase and 7.52  $\mu$ l PCR grade water per sample were mixed and 12  $\mu$ l was added to  
167 each well in a new 96-well plate. 1  $\mu$ l of the appropriate barcode pair (Supplementary  
168 Table 4) at 10 $\mu$ M was added to each well. Finally, the 7  $\mu$ l of Tagmentation mix was



169 added, making sure to transfer all the beads. PCR reactions were run at 72°C for 3  
170 minutes, 95°C for 1 minute, followed by 14 cycles of 95°C for 10 seconds, 55°C for 20  
171 seconds and 72°C for 1 minute. Following PCR, 2 µl of each sample was pooled and 40  
172 µl of this pool was bead washed with 36 µl (0.8X) AMPure XP beads (2 washes in 200µl  
173 70% ethanol) for the routine samples. For the rapid response run, 100 µl of the pool was  
174 washed with 60 µl (0.6X) AMPure XP. Pools were eluted in 20 µl of EB (Qiagen  
175 Catalogue No. 19086). The barcoded pool was quantified using Qubit High Sensitivity kit  
176 (Catalogue No. Q32851).

177 A nanopore sequencing library was then made, largely following the SQK-LSK109  
178 protocol. The end-prep reaction was prepared as follows: 7 µl Ultra II end prep buffer, 3  
179 µl Ultra II end prep enzyme mix, 40 µl nuclease free water and 10 µl of washed barcoded  
180 pool from the previous step (final volume 60 µl). The reaction was incubated at room  
181 temperature for 15 mins and 65°C for 10 mins, followed by a hold at 4°C for at least 1  
182 min. This was bead-washed using 60 µl of AMPure Beads (1X) and two 200µl 70%  
183 ethanol washes and eluted in 61 µl nuclease free water. The end-prepped DNA was taken  
184 forward to the adapter ligation as follows: 30 µl end-prepped pool from previous step  
185 (~60 ng), 30 µl nuclease free water, 25 µl LNB (ONT), 10 µl NEBNext Quick T4 Ligase  
186 and 5 µl AMX (ONT) was mixed and incubated at room temperature for 20 minutes.  
187 After the incubation, the full volume was washed with 40 µl AMPure XP beads and 2  
188 consecutive 250 µl SFB (ONT) washes with resuspension of beads both times and this  
189 was eluted in 15 µl of EB (ONT). The final library was quantified with Qubit High

190 Sensitivity and size checked on a Tapestation with D5000 tape. 12  $\mu$ l (~30-50 ng) was  
191 used for flowcell loading, with the addition of 37.5  $\mu$ l SQB and 25.5  $\mu$ l LB.

192

### 193 ***CoronaHiT-Illumina library preparation***

194 PCR products were tagmented and barcoded as described for the CoronaHiT-ONT library  
195 preparation, however, standard Nextera XT Index Kit indexes were used (Sets A to D for  
196 up to 384 combinations, Illumina Catalogue No's FC-131-2001, FC-131-2002, FC-131-  
197 2003 and FC-131-2004). The PCR master mix was adjusted and water removed to add 2  
198  $\mu$ l each of the P7 and P5 primers. Five microliters of each barcoded sample was pooled  
199 (without quantification) and 100  $\mu$ l of the library pool was size selected with 0.8X  
200 AMPure XP beads (80  $\mu$ l), with final elution in 50  $\mu$ l EB (10mM Tris-HCl). The  
201 barcoded pool was sized on a Agilent Tapestation D5000 tape and quantified using  
202 QuantiFluor® ONE dsDNA System (Promega, WI, USA) and the molarity calculated.  
203 The Illumina library pool was run at a final concentration of 1.5 pM on an Illumina  
204 Nextseq500 instrument using a Mid Output Flowcell (NSQ® 500 Mid Output KT v2  
205 (300 CYS) Illumina Catalogue FC-404-2003) following the Illumina recommended  
206 denaturation and loading recommendations which included a 1% PhiX spike (PhiX  
207 Control v3 Illumina Catalogue FC-110-3001).

208

## 209 ***ARTIC LoCost protocol Nanopore library preparation***

210 After ARTIC multiplex PCR, library preparation was performed using the nCoV-2019  
211 sequencing protocol v3 (LoCost) V3 (Quick, 2020). Briefly, PCR Pool 1 and 2 were  
212 pooled for each sample and diluted 1 in 10 (2.5 µl Pool 1, 2.5 µl Pool 2 and 45 µl  
213 nuclease free water), and end-prepped as follows: 1.2 µl Ultra II end prep buffer, 0.5 µl  
214 Ultra II end prep enzyme mix, 3.3 µl PCR dilution from previous step and 5 µl nuclease  
215 free water (final volume 15 µl). The reaction was incubated at room temperature for 15  
216 min and 65°C in a thermocycler for 15 min and incubated on ice for 1 min. Native  
217 barcode ligation was prepared in a new plate: 0.75 µl end-prepped DNA, 1.25 µl native  
218 barcode, 5 µl Blunt/TA Ligase Master Mix, 3 µl nuclease free water, (final volume 10  
219 µl). The reaction was incubated at room temperature 20 min and 65°C in a thermocycler  
220 for 10 min and incubated on ice for 1 min. Amplicons were pooled together (2 µl for 95  
221 samples and 5 µl for 59 samples) and underwent a 0.4X AMPure bead wash with two 250  
222 µl SFB washes and one 70% ethanol wash. DNA was eluted in 30 µl of Qiagen EB.  
223 Adapter ligation was performed on the full volume (30 µl barcoded amplicon pool, 5 µl  
224 Adapter Mix II (ONT), 10 µl NEBNext Quick Ligation Reaction Buffer (5X), 5 µl Quick  
225 T4 DNA Ligase). The ligation reaction was incubated at room temperature for 20 min  
226 and 1X bead washed (50 µl AMPure XP beads) with 250 µl SFB two times. The library  
227 was eluted in 15 µl of elution buffer (ONT) and quantified. 15 ng of the adapted library  
228 was used for final loading.

229

## 230 ***Nanopore sequence analysis***

231 Basecalling was performed using Guppy v.4.2.2 (Oxford Nanopore Technologies) in high  
232 accuracy mode (model dna\_r9.4.1\_450bps\_hac), on a private OpenStack cloud at  
233 Quadram Institute Bioscience using multiple Ubuntu v18.04 virtual machines running  
234 Nvidia T4 GPU.

235

236 The CoronaHiT-ONT sequencing data were demultiplexed using guppy\_barcode  
237 (v4.2.2) with a custom arrangement of the barcodes as described at  
238 [https://github.com/quadram-institute-bioscience/coronahit\\_guppy](https://github.com/quadram-institute-bioscience/coronahit_guppy), with the option  
239 ‘require\_barcodes\_both\_ends’ and a score of 60 at both ends to produce 95 FASTQ files  
240 (94 SARS-CoV-2 samples and 1 negative control) and 61 FASTQ files (59 SARS-CoV-2  
241 samples and 2 negative control) for the routine and rapid response runs, respectively. The  
242 ARTIC ONT sequencing data were demultiplexed using guppy\_barcode (v4.2.2) with  
243 the option ‘require\_barcodes\_both\_ends’ and a score of 60 at both ends to produce 95  
244 FASTQ files (94 SARS-CoV-2 samples and 1 negative control) and 61 FASTQ files (59  
245 SARS-CoV-2 samples and 2 negative control) for the routine and rapid response runs,  
246 respectively.

247

248 The downstream analysis was performed using a copy of the ARTIC pipeline (v1.1.3) as  
249 previously described (Loman, Rowe, and Rambaut 2020) to generate a consensus  
250 sequence for each sample in FASTA format. The pipeline includes the following main  
251 steps: The input reads were filtered based on reads length (ARTIC: 400-700; CoronaHiT:

252 150-600), and mapped to the Wuhan-Hu-1 reference genome (accession MN908947.3)  
253 using minimap2 (v 2.17-r941). The mapped bases in BAM format were trimmed off in  
254 primer regions by the ARTIC subcommand align\_trim for ARTIC LoCost data. For  
255 CoronaHiT-ONT data, we used the subcommand samtools ampliconclip (v 1.11) at the  
256 primer trimming step ([https://github.com/quadram-institute-](https://github.com/quadram-institute-bioscience/fieldbioinformatics/tree/coronahit)  
257 [bioscience/fieldbioinformatics/tree/coronahit](https://github.com/quadram-institute-bioscience/fieldbioinformatics/tree/coronahit)). The trimmed reads were then used for  
258 variant calling with medaka (v 1.2.0) and longshot (v 0.4.1). The final consensus was  
259 generated from a filtered VCF file and a mask file of positions with either a depth of  
260 coverage lower than 20 or a SNP in an amplifying primer site. The consensus sequences  
261 were uploaded to GISAID and the raw sequence data was uploaded to the European  
262 Nucleotide Archive under BioProject PRJEB41737. The accession numbers for each  
263 sample are available in Supplementary Table 1. The metrics and results of all  
264 experiments are available in Supplementary Table 2 and are summarised in Table 1.

265

### 266 ***Illumina sequence analysis***

267 Additional samples, not reported in this study, were included on Illumina NextSeq runs.  
268 The raw reads were demultiplexed using bcl2fastq (v2.20) (Illumina Inc.) to produce 311  
269 FASTQ files for the run with the routine samples (112 SARS-CoV-2 samples and 3  
270 negative controls) and the run with the rapid response samples (247 SARS-CoV-2  
271 samples, 4 negative controls, and 2 positive controls) with only the relevant samples  
272 analysed in this paper. The reads were used to generate a consensus sequence for each

273 sample using an open source pipeline adapted from <https://github.com/connor->  
274 [lab/ncov2019-artic-nf](https://github.com/connor-lab/ncov2019-artic-nf) (  
275 <https://github.com/quadram-institute-bioscience/ncov2019-artic-nf/tree/qib>). Briefly, the  
276 reads had adapters trimmed with TrimGalore  
277 (<https://github.com/FelixKrueger/TrimGalore>), were aligned to the Wuhan-Hu-1  
278 reference genome (accession MN908947.3) using BWA-MEM (v0.7.17) (Li 2013), the  
279 ARTIC amplicons were trimmed and a consensus built using iVar (v.1.2.3) (Grubaugh  
280 et al. 2019).

281

## 282 **Quality Control**

283 The COG-UK consortium defined a consensus sequence as passing COG-UK quality  
284 control if greater than 50% of the genome was covered by confident calls or there was at  
285 least 1 contiguous sequence of more than 10,000 bases and with no evidence of  
286 contamination. This is regarded as the minimum amount of data to be phylogenetically  
287 useful. A confident call was defined as having a minimum of 10X depth of coverage for  
288 Illumina data and 20X depth of coverage for Nanopore data. If the coverage fell below  
289 these thresholds, the bases were masked with Ns. Low quality variants were also masked  
290 with Ns. The QC threshold for inclusion in GISAID was higher, requiring that greater  
291 than 90% of the genome was covered by confident calls with no evidence of  
292 contamination.

293

## 294 ***Phylogenetic analysis***

295 For each sample sequenced in 3 separate experiments (CoronaHiT-ONT, CoronaHiT-  
296 Illumina, ARTIC-ONT), a phylogeny was generated from all of the consensus genomes  
297 (n=216 for the routine samples and n=132 for the rapid response samples) passing  
298 GISAID QC over all experiments (n=72 out of 95, and n=44 out of 59). A multiple  
299 FASTA alignment was created by aligning all samples to the reference genome  
300 MN908947.3 with MAFFT v7.470. A maximum likelihood tree was estimated with  
301 IQTREE2 (v2.0.4) (Minh et al. 2020) under the HKY model (Hasegawa, Kishino, and  
302 Yano 1985), collapsing branches smaller than  $10^{-7}$  into a polytomy. SNPs in the multiple  
303 FASTA alignment were identified using SNP-sites (v2.5.1) (Page et al. 2016) and the tree  
304 was visualised with FigTree (v1.4.4) (<https://github.com/rambaut/figtree>).

305

## 306 ***Results***

307 A novel library preparation method, CoronaHiT, was developed for SARS-CoV-2  
308 genome sequencing, which combines a cheap transposase-based introduction of adapters  
309 (Illumina Nextera) with symmetric PCR barcoding of up to 96 samples (or 95 samples  
310 with a negative control) on a MinION. Alternatively, if higher throughput is needed, the  
311 barcodes can be switched for Illumina sequencing. For ONT sequencing, Nextera adapter  
312 complementary primer sequences were added to ONT PCR barcodes and used to barcode  
313 ARTIC PCR products (Figure 1) as described in the methods. For Illumina sequencing,  
314 the method is a streamlined and cheaper version of standard Illumina library preparations.  
315 CoronaHiT does not require individual sample washes and allows samples to be

316 processed uniformly without quantification or normalisation as with the ARTIC LoCost  
317 method.  
318  
319 The CoronaHiT method was tested by multiplexing 95 SARS-CoV-2 routine COG-UK  
320 samples plus a blank (hereinafter referred to as the Routine Samples) on a MinION  
321 flowcell and on an Illumina NextSeq run. Another 59 samples, including 18 query  
322 outbreak samples, plus blanks (hereinafter referred to as the Rapid Response samples)  
323 were rapidly sequenced (within 24 hrs of receipt, with results available the following day)  
324 on a second flowcell, as well as on Illumina NextSeq. All samples were also sequenced  
325 using the ARTIC LoCost library preparation protocol on the MinION for comparison.  
326 For the routine samples, 30 hours of sequencing data was used for both CoronaHiT-ONT  
327 and ARTIC LoCost, and for the rapid response set, 18 hours was used; the full dataset  
328 was used for both CoronaHiT-Illumina runs. The different methods produced different  
329 amounts of demultiplexed data. For the routine samples, CoronaHiT-ONT yielded 9.6  
330 Gbases of sequence data, ARTIC LoCost sequencing produced 8.0 Gbases of data, and  
331 CoronaHiT-Illumina yielded 15.7 Gbases giving on average 1145X, 1719X and 4649X  
332 coverage per sample (Table 1). For the rapid response dataset, CoronaHiT-ONT  
333 produced 5.7 Gbases, ARTIC LoCost 4.5 Gbases, and CoronaHiT-Illumina 7.3 Gbases  
334 resulting in 1104X, 1421X, and 3010X coverage per sample respectively. Both  
335 CoronaHiT-ONT runs had less variation in coverage between samples compared to the  
336 ARTIC LoCost runs, with lower standard deviation relative to the mean (Table 1). The  
337 lower coverage for CoronaHiT-ONT compared to ARTIC is related to the shorter read



338 lengths and the increased proportion of barcode/adaptor sequence in each read and,  
339 hence, the reduced mappable region of each read.  
340  
341 Taking all the genomes which passed COG-UK QC, the CoronaHiT-Illumina sequencing  
342 runs produced the shortest mappable mean read length at 135 and 131 bases for the  
343 routine samples and rapid response samples respectively, just short of the maximum 150  
344 bases for the PE 151 chemistry; ARTIC LoCost produced 386 and 384 bases, and  
345 CoronaHiT-ONT sequencing produced mappable mean read lengths of 205 and 241  
346 bases. The shorter read lengths for CoronaHiT are related to the use of bead-linked  
347 transposases for tagmentation, resulting in the removal of the ends of the ARTIC PCR  
348 products. The introduction of a 0.6X bead wash for the rapid response CoronaHiT-ONT  
349 run (instead of the 0.8X bead wash for the routine run) resulted in the longer mapped  
350 reads and contributed to a reduction in the difference in average coverage between  
351 CoronaHiT and ARTIC (from 1145x vs 1719x in routine run dropping to 1104X vs  
352 1421X in the rapid response run, with similar ratios of raw data produced by the methods  
353 in the two runs).  
354  
355 The demultiplexing steps for CoronaHiT-ONT were different from those used for ARTIC  
356 ONT sequencing as described in the methods section. Comparing the nanopore  
357 sequencing methods for the routine samples, 74.7% and 81.9% of reads were  
358 demultiplexed successfully for CoronaHiT-ONT and ARTIC LoCost respectively when  
359 only reads with a PHRED (quality) score above Q7 are considered; for the rapid response  
360 set, 69.6% and 71.6% were demultiplexed for CoronaHiT-ONT and ARTIC LoCost. The

361 rest of the reads were unassigned, due to an inability to detect the barcode sequences at  
362 both ends of the reads. The negative controls contained zero mapping reads to SARS-  
363 CoV-2 for all nanopore datasets. The Illumina routine dataset had mapped reads,  
364 however, the vast majority were primers dimers (range of 0-4 SARS-CoV-2 reads >40bp  
365 mapped out of the 3 negative controls).

366

367 Poor quality consensus genomes were generally associated with a lower SARS-CoV-2  
368 viral load in the clinical samples i.e. higher RT-qPCR Ct values (generally above Ct 32)  
369 were more likely to fail COG-UK and GISAID quality control thresholds. For all  
370 methods the number of Ns increased significantly in samples with a Ct above 32, which  
371 equates to approx 100 viral genome copies in the PCR reaction (Figure 2).

372 Supplementary Figures 1a-f show the Ns (missing or masked bases) within the consensus  
373 genomes - the three ARTIC PCR primer dropout areas (Benjamin Farr et al. 2020) are  
374 clearly visible. Comparing the routine samples with a Ct of 32 or below (n=65; Cts for  
375 most rapid response samples were unknown), the mean (median) number of Ns was 815  
376 (121) for ARTIC LoCost, 111 (47) for CoronaHiT-Illumina, and 682 (339) for  
377 CoronaHiT-ONT. If all samples are included for the routine set (including higher Ct  
378 samples) then the number of Ns increases substantially to a mean (median) of 1635 (121)  
379 bases for ARTIC LoCost, 688 (53) for CoronaHiT-Illumina and 1504 (359) for  
380 CoronaHiT-ONT.

381

382 The number of samples passing the COG-UK QC criteria was 73 for ARTIC LoCost, 76  
383 for CoronaHiT-ONT and 78 for CoronaHiT-Illumina in the routine set and 44 for ARTIC

384 LoCost, and 48 for both CoronaHiT-ONT and CoronaHiT-Illumina in the rapid response  
385 set. The stricter GISAID QC criteria reduces the number of samples passing QC, with the  
386 CoronaHiT method outperforming ARTIC LoCost. For the routine samples, 59 samples  
387 passed for ARTIC LoCost, 66 passed for CoronaHiT-ONT and 74 passed for CoronaHiT-  
388 Illumina and for the rapid response set 40 passed for ARTIC LoCost, and 44 passed for  
389 both CoronaHiT-ONT and CoronaHiT-Illumina. Overall, the pass rate was 64.3% for  
390 ARTIC LoCost, 71.4% for CoronaHiT-ONT and 76.6% for CoronaHiT-Illumina. When  
391 considering higher viral load samples with a known Ct of 32 or below, the pass rate for  
392 both GISAID and COG-UK QC was higher, with 89.2% passing for ARTIC LoCost and  
393 95.2% and 97.6% passing for CoronaHiT-ONT and CoronaHiT-Illumina, respectively  
394 (full details are shown in Table 2). CoronaHiT-ONT had a higher pass rate compared to  
395 ARTIC LoCost even though the average coverage was lower, this related to more even  
396 coverage across samples on the flowcell (lower standard deviation between samples  
397 relative to the mean - Table 1).

398

399 To assess the impact of data quality differences on clustering of lineages, we built  
400 maximum likelihood trees for both the routine and rapid response runs with each of the  
401 72 and 44 consensus genomes that passed QC from the ARTIC LoCost, CoronaHiT-ONT  
402 and CoronaHiT-Illumina sequencing experiments. When the consensus genomes were  
403 placed on a phylogenetic tree for the routine set, CoronaHiT-Illumina, ARTIC LoCost,  
404 CoronaHiT-ONT showed the same clustering for most samples, except for three cases  
405 (EB1DB, EC741 and EC644) where we note that their ARTIC LoCost consensus show  
406 an increased number of ambiguous bases. All variant differences between the samples are

407 noted in Supplementary Table 3, together with the sequence length (discounting  
408 ambiguous bases whenever there is a difference). Out of all samples in both datasets,  
409 there were only two SNP discrepancies, one in sample F04F8 between CoronaHiT-ONT  
410 and CoronaHiT-Illumina, with ARTIC LoCost calling the SNP ambiguous, and in sample  
411 F0A23 with CoronaHiT-ONT disagreeing with the other methods (Supplementary Table  
412 3). The SNP differences did not affect the classification (i.e. closest sequence in the  
413 database), and there were no SNP differences between ARTIC-ONT and CoronaHiT-  
414 Illumina. The main other source of variation between the samples is that the Illumina  
415 genomes allow IUPAC (IUPAC-IUB Comm. on Biochem. Nomenclature (CBN) 1970)  
416 symbols for “partially” ambiguous bases. These data show that CoronaHiT provides  
417 highly accurate lineage calling compared to ARTIC LoCost.

418

419 The average number of SNPs between the Wuhan-Hu-1 reference genome and the  
420 consensus genomes varied between 7.99 SNPs for and 11.00 SNPs for the routine  
421 samples, and 18.2 and 20.4 SNPs for the rapid response samples across all methods (see  
422 Table 2 and Supplementary Table 2). The mean number of SNPs in CoronaHiT-Illumina  
423 was higher compared to the two ONT sequencing methods (Table 2) due to ambiguous  
424 bases in the Illumina dataset being regarded as SNPs in these calculations (Table 2).

425

426 The reagent cost per sample for CoronaHiT-ONT was £8.46 when sequencing 95  
427 samples and a negative control on a MinION flowcell, marginally cheaper but similar to  
428 ARTIC sequencing at £9.75 per sample (cost breakdown in Supplementary Table 5). If

429 384 samples are sequenced on an Illumina NextSeq Mid output run with the CoronaHiT  
430 library preparation method, the per sample cost is £5.62.

431

## 432 ***Discussion***

433 Rapid viral genome sequencing during outbreaks is changing how we study disease  
434 epidemiology (Kafetzopoulou et al. 2019; Joshua Quick et al. 2016). The recent SARS-  
435 CoV-2 global pandemic has again highlighted the use of sequencing in the control of the  
436 spread of the disease. Nanopore technology is particularly suited to outbreak sequencing  
437 as it is portable, does not require expensive machinery and is accessible throughout the  
438 world (Faria et al. 2016). We present a novel platform agnostic method, CoronaHiT, for  
439 flexible throughput, cost effective and low complexity sequencing of SARS-CoV-2  
440 genomes to respond to the pandemic at the local and national level.

441

442 The ARTIC LoCost protocol (Quick, 2020) has been widely adopted for SARS-CoV-2  
443 genome sequencing and allows up to 95 samples (plus a negative control) to be  
444 sequenced at a time on a MinION. CoronaHiT is just as cheap, simple and fast, but the  
445 combination of transposase introduction of adapters with PCR based barcoding allows for  
446 more even coverage between multiplexed samples, resulting in a higher proportion of  
447 samples passing QC. It is also designed to be platform agnostic, simply switching  
448 barcodes to move to Illumina. This allows the user to flexibly sequence low or high  
449 throughput depending on rapidly changing requirements in the pandemic (Bayliss et al.  
450 2017; Josh Quick 2020). With the use of asymmetric barcode primers described in Perez-

451 Sepulveda et al. 2020, it is possible to sequence SARS-CoV-2 at very high throughput on  
452 Illumina; in fact we have recently sequenced over 1000 SARS-CoV-2 genomes on a  
453 single Illumina NextSeq High Output run using this approach (data not shown). The  
454 CoronaHiT-Illumina library preparation method is cheaper (reduced reaction volumes)  
455 and significantly more streamlined (no sample washing or quantification before pooling,  
456 no use of stop solution, no clean-up after tagmentation and no clean-up of barcoded PCR  
457 products) than standard Illumina library preparation.

458  
459 Tiling PCR approaches, such as ARTIC, are prone to high genome coverage variation  
460 due to variable primer efficiency in multiplex reactions. Some regions of the SARS-CoV-  
461 2 genome have hundreds of times higher coverage than adjacent regions using ARTIC,  
462 therefore average coverage of at least 1000X is required to obtain at least 20X coverage  
463 of the difficult regions of the genome. We demonstrate that we can achieve >1000X  
464 SARS-CoV-2 genome coverage in ~20 minutes per sample using CoronaHiT-ONT on  
465 MinION, with a full set of 95 samples taking ~30 hours). While the CoronaHiT-ONT  
466 runs described here are very consistent, sequencing yield depends on flowcell quality. We  
467 recommend aiming for at least 100 Mbases of estimated sequencing yield per sample to  
468 provide sufficient data for >1000X coverage/sample (average across flowcell) using  
469 CoronaHiT-ONT.

470  
471 Results demonstrate that all methods are unreliable at producing high quality consensus  
472 genomes from positive clinical samples with diagnostic RT-qPCR Cts above 32 (approx.  
473 100 viral genome copies), however, CoronaHiT performs better in these samples (Figure

474 2), producing fewer Ns, likely due to the additional rounds of PCR during barcoding.  
475 Below or equal to Ct 32, CoronaHiT-ONT, CoronaHiT-Illumina and ARTIC LoCost  
476 produce similar results. While more samples pass both QC measures with CoronaHiT-  
477 ONT and CoronaHiT-Illumina compared to ARTIC LoCost, primer dropout regions can  
478 be more pronounced in these methods (Supplementary Figure 1). For higher quality  
479 consensus genomes, sequencing may be run for longer. Additionally, a reduction in  
480 ARTIC PCR annealing temperature from 65°C to 63°C may help improve coverage  
481 across these regions (Benjamin Farr et al. 2020). However, data produced from  
482 CoronaHiT was sufficient to provide accurate consensus genomes that result in the same  
483 lineages and on the same branches on the phylogenetic tree as ARTIC LoCost (Figure 3).  
484 Therefore, we have demonstrated high quality, multiplexed SARS-CoV-2 genome  
485 sequencing of 95 samples on a single flowcell. If the ARTIC PCR step is optimised to  
486 even the coverage of the amplicons (as demonstrated in the Sanger COVID-19 ARTIC  
487 Illumina protocol (Benjamin Farr et al. 2020)), less overall coverage will be required per  
488 genome and more samples can be multiplexed using all methods.  
489  
490 In conclusion, we demonstrate that CoronaHiT can be used to sequence 96 SARS-CoV-2  
491 samples on a single MinION flowcell, with the option of higher throughput on Illumina.  
492 This platform agnostic method is simple, rapid and cheap and results in more samples  
493 passing QC than ARTIC LoCost while providing almost identical phylogenetic results.  
494 CoronaHiT can help scientists around the world sequence SARS-CoV-2 genomes with  
495 highly flexible throughput, thereby increasing our understanding, and reducing the  
496 spread, of the pandemic.

497

498 ***Ethical approval***

499 The COVID-19 Genomics UK Consortium has been given approval by Public Health  
500 Englands Research Ethics and Governance Group (PHE R&D Ref: NR0195).

501

502 **Acknowledgements**

503 Thanks to George Taiaroa and Torsten Seemann from the Microbiological Diagnostic  
504 Unit Public Health Laboratory at the University of Melbourne for their advice and  
505 assistance, to Niamh Tumelty from the University of Cambridge for assistance and to  
506 Darren Heavens from the Earlham Institute for his advice on library preparation. Thanks  
507 to the COG-UK Consortium Study Group for their contributions.

508

509 **Funding statement**

510 The authors gratefully acknowledge the support of the Biotechnology and Biological  
511 Sciences Research Council (BBSRC); this research was funded by the BBSRC Institute  
512 Strategic Programme Microbes in the Food Chain BB/R012504/1 and its constituent  
513 projects BBS/E/F/000PR10348, BBS/E/F/000PR10349, BBS/E/F/000PR10351, and  
514 BBS/E/F/000PR10352. DJB, NFA, TLV and AJP were supported by the Quadram  
515 Institute Bioscience BBSRC funded Core Capability Grant (project number  
516 BB/CCG1860/1). EMA was funded by the BBSRC Institute Strategic Programme Gut



517 Microbes and Health BB/R012490/1 and its constituent project(s) BBS/E/F/000PR10353  
518 and BBS/E/F/000PR10356. The sequencing costs were funded by the COVID-19  
519 Genomics UK (COG-UK) Consortium which is supported by funding from the Medical  
520 Research Council (MRC) part of UK Research & Innovation (UKRI), the National  
521 Institute of Health Research (NIHR) and Genome Research Limited, operating as the  
522 Wellcome Sanger Institute. The author(s) gratefully acknowledge the UKRI  
523 Biotechnology and Biological Sciences Research Council's (BBSRC) support of The  
524 Norwich Research Park Biorepository. LG was supported by a DART MRC iCASE and  
525 Roche Diagnostics. APT was funded by Sara Borrell Research Grant CD018/0123 from  
526 ISCIII and co-financed by the European Development Regional Fund (A Way to Achieve  
527 Europe program) and APT QIB internship additionally funded by "Ayuda de la SEIMC".  
528 The funders had no role in study design, data collection and analysis, decision to publish,  
529 or preparation of the manuscript.

530

### 531 ***Financial declaration***

532 LG received a partial support for his PhD from Roche. The use of Roche technology for  
533 diagnostics in NNUH is coincidental.

534

### 535 ***Author contributions***

536 All authors have read this manuscript and consented to its publication. The CoronaHiT  
537 method was developed by DJB and AA. The study was designed and conceived by DJB,

538 JOG, AJP. Paper writing was by DJB, AA, AJP, JOG, GLK, APT, TLV, SR, LM.  
539 Sequencing and library preparation was performed by DJB, AA, SR, GLK, APT, AB,  
540 AJT, NMT, RG, JOG. Bioinformatics analysis and informatics were performed by TLV,  
541 LOM, NFA, AJP. Clinical diagnostics and extractions were managed by AK, SD, RP,  
542 NE, EM. Samples and metadata were collected by LG, AB, AVG, EMA, AK and MD  
543 and biobanked by RS, RNA was extracted by AB, AJT. Risk assessments were by GLK,  
544 JW. Project management and oversight was by GLK, JOG, AJP, LM, MW, AEM, JW.  
545 Funding for the project was secured by JOG, AJP, IGC.

## References

- AusDiagnostics. 2020. 'SARS-COV-2, INFLUENZA AND RSV 8-WELL'. 20081. <https://www.ausdx.com/qilan/Products/20081-r01.1.pdf>.
- Bayliss, Sion C., Vicky L. Hunt, Maho Yokoyama, Harry A. Thorpe, and Edward J. Feil. 2017. 'The Use of Oxford Nanopore Native Barcoding for Complete Genome Assembly'. *GigaScience* 6 (3). <https://doi.org/10.1093/gigascience/gix001>.
- Beier, Sebastian, Axel Himmelbach, Christian Colmsee, Xiao-Qi Zhang, Roberto A. Barrero, Qisen Zhang, Lin Li, et al. 2017. 'Construction of a Map-Based Reference Genome Sequence for Barley, *Hordeum Vulgare* L.' *Scientific Data* 4 (1): 170044. <https://doi.org/10.1038/sdata.2017.44>.
- Benjamin Farr, Diana Rajan, Emma Betteridge, Lesley Shirley, Michael Quail, Naomi Park, Nicholas Redshaw, et al. 2020. 'COVID-19 ARTIC v3 Illumina Library Construction and Sequencing Protocol', May. <https://doi.org/10.17504/protocols.io.bgq3jvyn>.
- Dong, Ensheng, Hongru Du, and Lauren Gardner. 2020. 'An Interactive Web-Based Dashboard to Track COVID-19 in Real Time'. *The Lancet Infectious Diseases* 0 (0). [https://doi.org/10.1016/S1473-3099\(20\)30120-1](https://doi.org/10.1016/S1473-3099(20)30120-1).
- Elbe, Stefan, and Gemma Buckland Merrett. 2017. 'Data, Disease and Diplomacy: GISAID's Innovative Contribution to Global Health'. *Global Challenges* 1 (1): 33–46. <https://doi.org/10.1002/gch2.1018>.
- Grubaugh, Nathan D., Karthik Gangavarapu, Joshua Quick, Nathaniel L. Matteson, Jaqueline Goes De Jesus, Bradley J. Main, Amanda L. Tan, et al. 2019. 'An Amplicon-Based Sequencing Framework for Accurately Measuring Intrahost Virus Diversity Using PrimalSeq and IVar'. *Genome Biology* 20 (1): 8. <https://doi.org/10.1186/s13059-018-1618-7>.
- Hasegawa, Masami, Hirohisa Kishino, and Taka-aki Yano. 1985. 'Dating of the Human-Ape Splitting by a Molecular Clock of Mitochondrial DNA'. *Journal of Molecular Evolution* 22 (2): 160–74. <https://doi.org/10.1007/BF02101694>.
- IUPAC-IUB Comm. on Biochem. Nomenclature (CBN). 1970. 'Abbreviations and Symbols for Nucleic Acids, Polynucleotides, and Their Constituents'. *Biochemistry* 9 (20): 4022–27. <https://doi.org/10.1021/bi00822a023>.
- Kafetzopoulou, L. E., S. T. Pullan, P. Lemey, M. A. Suchard, D. U. Ehichioya, M. Pahlmann, A. Thielebein, et al. 2019. 'Metagenomic Sequencing at the Epicenter of the Nigeria 2018 Lassa Fever Outbreak'. *Science (New York, N.Y.)* 363 (6422): 74–77. <https://doi.org/10.1126/science.aau9343>.
- Li, Heng. 2013. 'Aligning Sequence Reads, Clone Sequences and Assembly Contigs with BWA-MEM'. *ArXiv:1303.3997 [q-Bio]*, March. <http://arxiv.org/abs/1303.3997>.
- Loman, Nicholas J., Will Rowe, and Andrew Rambaut. 2020. 'NCoV-2019 Novel Coronavirus Bioinformatics Protocol'. v1.1.0. <https://artic.network/ncov-2019/ncov2019-bioinformatics-sop.html>.
- Minh, Bui Quang, Heiko A. Schmidt, Olga Chernomor, Dominik Schrempf, Michael D. Woodhams, Arndt von Haeseler, and Robert Lanfear. 2020. 'IQ-TREE 2: New

- Models and Efficient Methods for Phylogenetic Inference in the Genomic Era’. *Molecular Biology and Evolution*, February.  
<https://doi.org/10.1093/molbev/msaa015>.
- Page, Andrew J., Ben Taylor, Aidan J. Delaney, Jorge Soares, Torsten Seemann, Jacqueline A. Keane, and Simon R. Harris. 2016. ‘SNP-Sites: Rapid Efficient Extraction of SNPs from Multi-FASTA Alignments’. *Microbial Genomics* 2 (4): e000056. <https://doi.org/10.1099/mgen.0.000056>.
- Perez-Sepulveda, B.M., Heavens, D., Pulford, C.V., Predeus, A.V., Low, R., Webster, H., Schudoma, C., Rowe, W., Lipscombe, J., Watkins, C., et al. (2020). An accessible, efficient and global approach for the large-scale sequencing of bacterial genomes. *BioRxiv* 2020.07.22.200840.
- Quick, Josh. 2020. ‘NCoV-2019 Sequencing Protocol V2’, April.  
<https://doi.org/10.17504/protocols.io.bdp7i5rn>.
- Quick, Joshua. 2020b. ‘NCoV-2019 Sequencing Protocol V3’, August, 2020.  
<https://www.protocols.io/view/ncov-2019-sequencing-protocol-v3-locost-bh42j8ye>.
- Quick, Joshua, Nicholas J. Loman, Sophie Duraffour, Jared T. Simpson, Ettore Severi, Lauren Cowley, Joseph Akoi Bore, et al. 2016. ‘Real-Time, Portable Genome Sequencing for Ebola Surveillance’. *Nature* 530 (7589): 228–32.  
<https://doi.org/10.1038/nature16996>.
- Rowan, Beth A., Darren Heavens, Tatiana R. Feuerborn, Andrew J. Tock, Ian R. Henderson, and Detlef Weigel. 2019. ‘An Ultra High-Density Arabidopsis Thaliana Crossover Map That Refines the Influences of Structural Variation and Epigenetic Features’. *Genetics* 213 (3): 771–87.  
<https://doi.org/10.1534/genetics.119.302406>.
- Shu, Yuelong, and John McCauley. 2017. ‘GISAID: Global Initiative on Sharing All Influenza Data – from Vision to Reality’. *Eurosurveillance* 22 (13): 30494.  
<https://doi.org/10.2807/1560-7917.ES.2017.22.13.30494>.

## Tables

**Table 1:** Summary statistics for each sequencing experiment. Sample specific metrics are available in Supplementary Table 2. (\*The CoronaHiT-Illumina total yield includes non-relevant samples on the sequencing run, while the deplexed yield only relates to relevant samples).

|                                           | Routine samples |              |                    | Rapid Response samples |              |                    |
|-------------------------------------------|-----------------|--------------|--------------------|------------------------|--------------|--------------------|
|                                           | CoronaHiT-ONT   | ARTIC LoCost | CoronaHiT-Illumina | CoronaHiT-ONT          | ARTIC LoCost | CoronaHiT-Illumina |
| <b>No. of samples</b>                     | 95              | 95           | 95                 | 59                     | 59           | 59                 |
| <b>Run time (h)</b>                       | 30              | 30           | 25.4               | 18                     | 18           | 24.4               |
| <b>Yielded bases (Gb)</b>                 | 10.3            | 8.5          | 43.9*              | 6.3                    | 4.8          | 48.6*              |
| <b>Bases deplexed (Gb)</b>                | 9.6             | 8.0          | 15.7               | 5.7                    | 4.5          | 7.3                |
| <b>Reads sequenced (&gt;Q7)</b>           | 24,764,627      | 15,733,349   | 113,756,312        | 13,044,532             | 8,824,469    | 53,678,322         |
| <b>Average PHRED score</b>                | 13.47           | 13.11        | 33.15              | 13.2                   | 12.98        | 33.48              |
| <b>Average coverage (X)</b>               | 1145X           | 1719X        | 4649X              | 1104X                  | 1421X        | 3010X              |
| <b>Standard deviation of coverage (X)</b> | 698X            | 1683X        | 4352X              | 439X                   | 1145X        | 3496X              |
| <b>Average read length (bases)</b>        | 374             | 448          | 135                | 413                    | 457          | 135                |
| <b>Average (Median) mapped length</b>     | 205.24 (195)    | 386 (386)    | 134.63 (150)       | 241.25 (244)           | 383.88 (385) | 131.43 (150)       |

|                                  |    |    |    |    |    |    |
|----------------------------------|----|----|----|----|----|----|
| <b>Samples passing GISAID QC</b> | 66 | 59 | 74 | 44 | 40 | 44 |
|----------------------------------|----|----|----|----|----|----|

**Table 2:** The number of consensus genomes passing and failing the different QC

thresholds for each experiment. Extended data are available in Supplementary Table 2.

|                                         | Routine samples |              |                    | Rapid Response samples |              |                    |
|-----------------------------------------|-----------------|--------------|--------------------|------------------------|--------------|--------------------|
|                                         | CoronaHiT-ONT   | ARTIC LoCost | CoronaHiT-Illumina | CoronaHiT-ONT          | ARTIC LoCost | CoronaHiT-Illumina |
| <b>No. of samples sequenced</b>         | <b>95</b>       | <b>95</b>    | <b>95</b>          | <b>59</b>              | <b>59</b>    | <b>59</b>          |
| Consensus genomes                       | 98.95% (94)     | 96.84% (92)  | 100% (95)          | 96.61% (57)            | 91.53% (54)  | 100% (59)          |
| Passing COG-UK QC                       | 80.00% (76)     | 76.84% (73)  | 82.11% (78)        | 81.36% (48)            | 74.58% (44)  | 81.36% (48)        |
| Passing GISAID QC                       | 69.47% (66)     | 62.11% (59)  | 77.89% (74)        | 74.58% (44)            | 67.80% (40)  | 74.58%(44)         |
| Failing COG-UK QC                       | 20.00% (19)     | 23.16% (22)  | 17.89% (17)        | 18.64% (11)            | 25.42%(15)   | 18.64% (11)        |
| Failing GISAID QC                       | 30.53%(29)      | 37.89% (36)  | 22.11% (21)        | 25.42%(15)             | 32.20% (19)  | 25.42% (15)        |
| Avg (Median) Ns of COG-UK passed        | 1504 (354)      | 1635 (121)   | 688 (53)           | 977 (606)              | 1101 (339)   | 911 (292)          |
| Avg SNPs of COG-UK passed               | 7.99            | 7.99         | 11.0               | 18.3                   | 18.2         | 20.4               |
| <b>No. of samples with known Ct ≤32</b> | <b>65</b>       | <b>65</b>    | <b>65</b>          | <b>18</b>              | <b>18</b>    | <b>18</b>          |

|                                  |             |             |             |             |             |             |
|----------------------------------|-------------|-------------|-------------|-------------|-------------|-------------|
| Consensus genomes                | 100% (65)   | 100% (65)   | 100% (65)   | 100% (18)   | 100% (18)   | 100% (18)   |
| Passing COG-UK QC                | 98.46% (64) | 98.46% (64) | 98.46% (64) | 100%(18)    | 94.44% (17) | 100% (18)   |
| Passing GISAID QC                | 95.38% (62) | 89.23% (58) | 98.46% (64) | 94.44% (17) | 88.89% (16) | 94.44% (17) |
| Failing COG-UK QC                | 1.54% (1)   | 1.54% (1)   | 1.54% (1)   | 0% (0)      | 5.56% (1)   | 0% (0)      |
| Failing GISAID QC                | 4.62% (3)   | 10.77% (7)  | 1.54% (1)   | 5.56% (1)   | 11.11% (2)  | 5.56% (1)   |
| Avg (Median) Ns of COG-UK passed | 682 (339)   | 815 (121)   | 111 (47)    | 895 (339)   | 911 (121)   | 1064 (514)  |
| Avg SNPs of COG-UK passed        | 8.19        | 8.17        | 10.2        | 18.8        | 18.9        | 20          |

## Figures

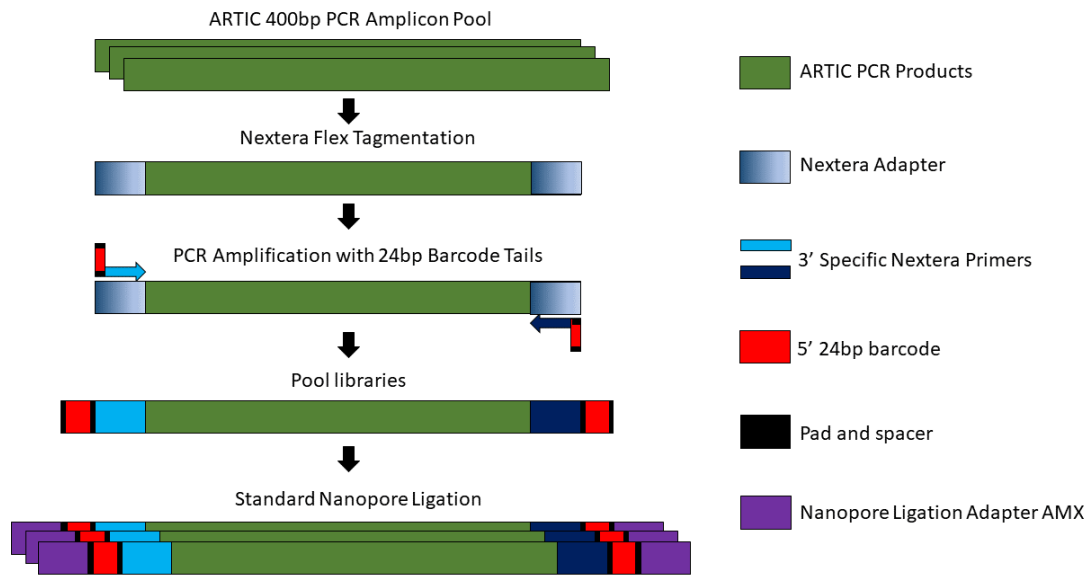

**Figure 1:** Workflow of CoronaHiT-ONT library preparation.

(a)



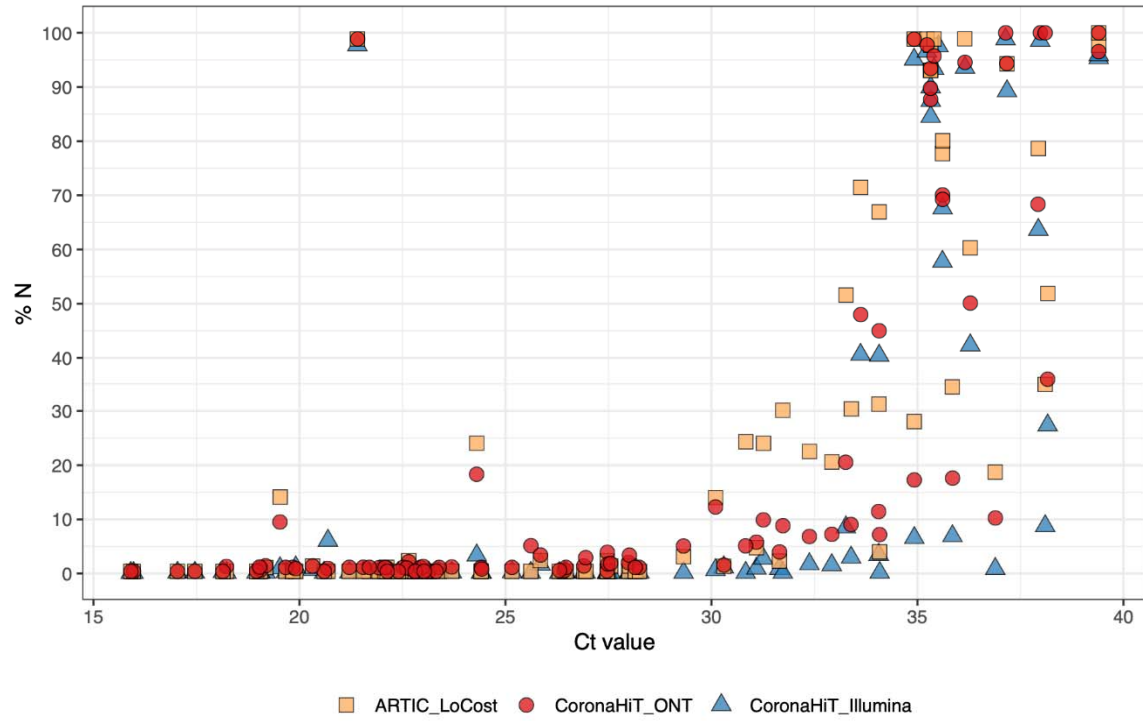

(b)

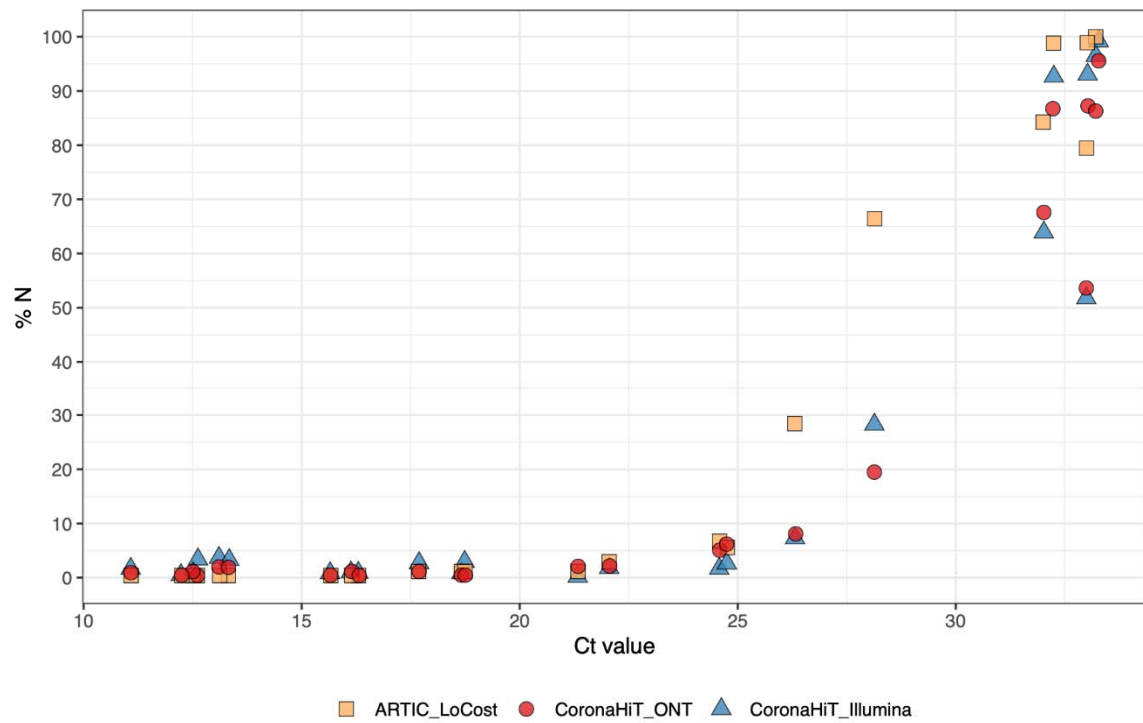

**Figure 2:** Ct value of the SARS-CoV-2 positive RNA samples sequenced using all three sequencing methods vs total number of Ns in the consensus sequence for the (a) routine sample set (b) and the rapid response sample set.



(b)

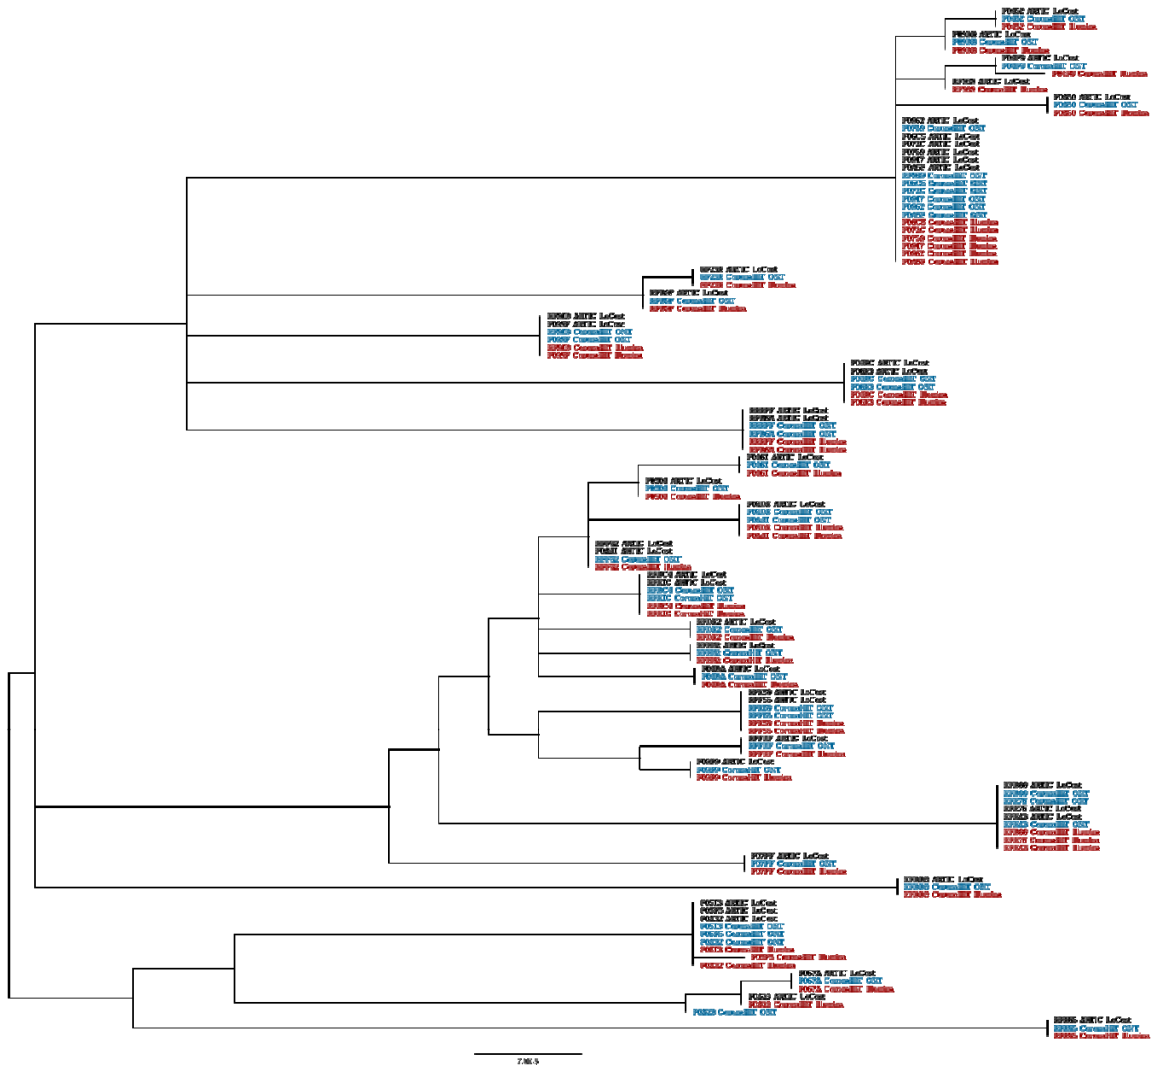

**Figure 3:** Maximum likelihood tree of the consensus genomes from each sequencing methods, showing agreement between methods for the (a) routine samples and (b) rapid response samples.
